# Supplementary material for: Elevated MMP9 expression in breast cancer is a predictor of shorter patient survival
Source: PubMed Central journal article supplement (PMC7297818; doi:10.1007/s10549-020-05670-x), 2020-05-22
Supplement: 10549_2020_5670_MOESM1_ESM.pdf [file 10549_2020_5670_MOESM1_ESM.pdf]

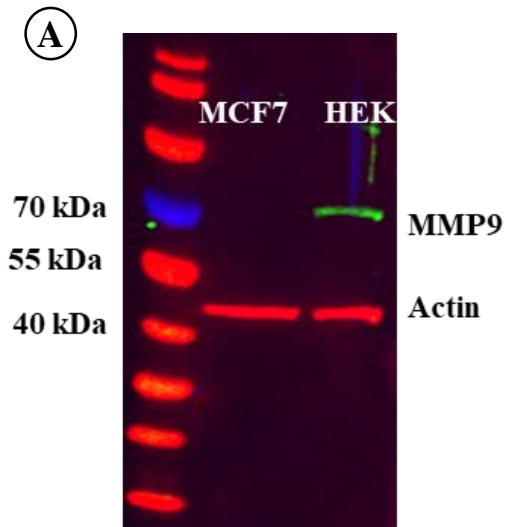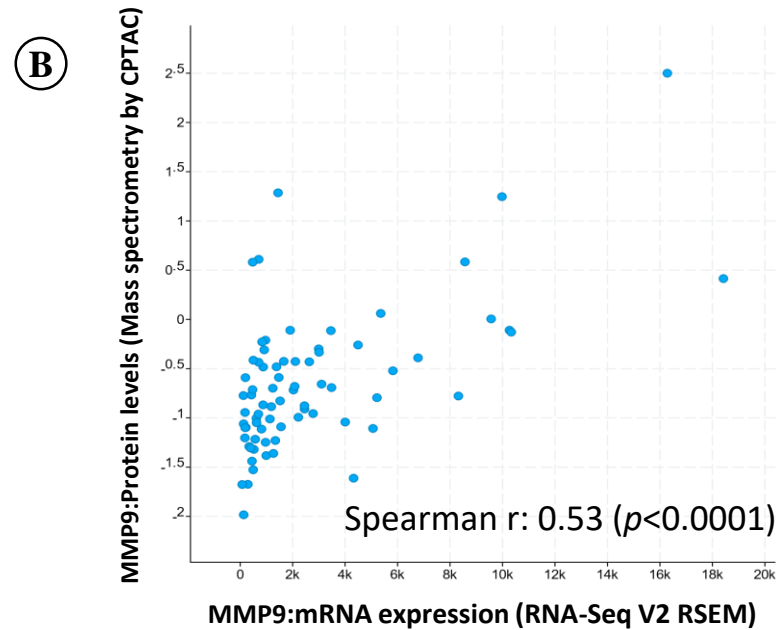

**Supplementary Fig.1 Western blot and association between *MMP9* mRNA and protein in BC.**

(a) Western blotting results for MMP9 protein expression in MCF7, and HEK cancer cell lines using rabbit monoclonal antibody against human MMP9. Green and red bands represent MMP9 and Beta-Actin (house-keeping) respectively. (b) Showing the positive association between MMP9 mRNA and protein (TCGA,<sup>25,33</sup>)

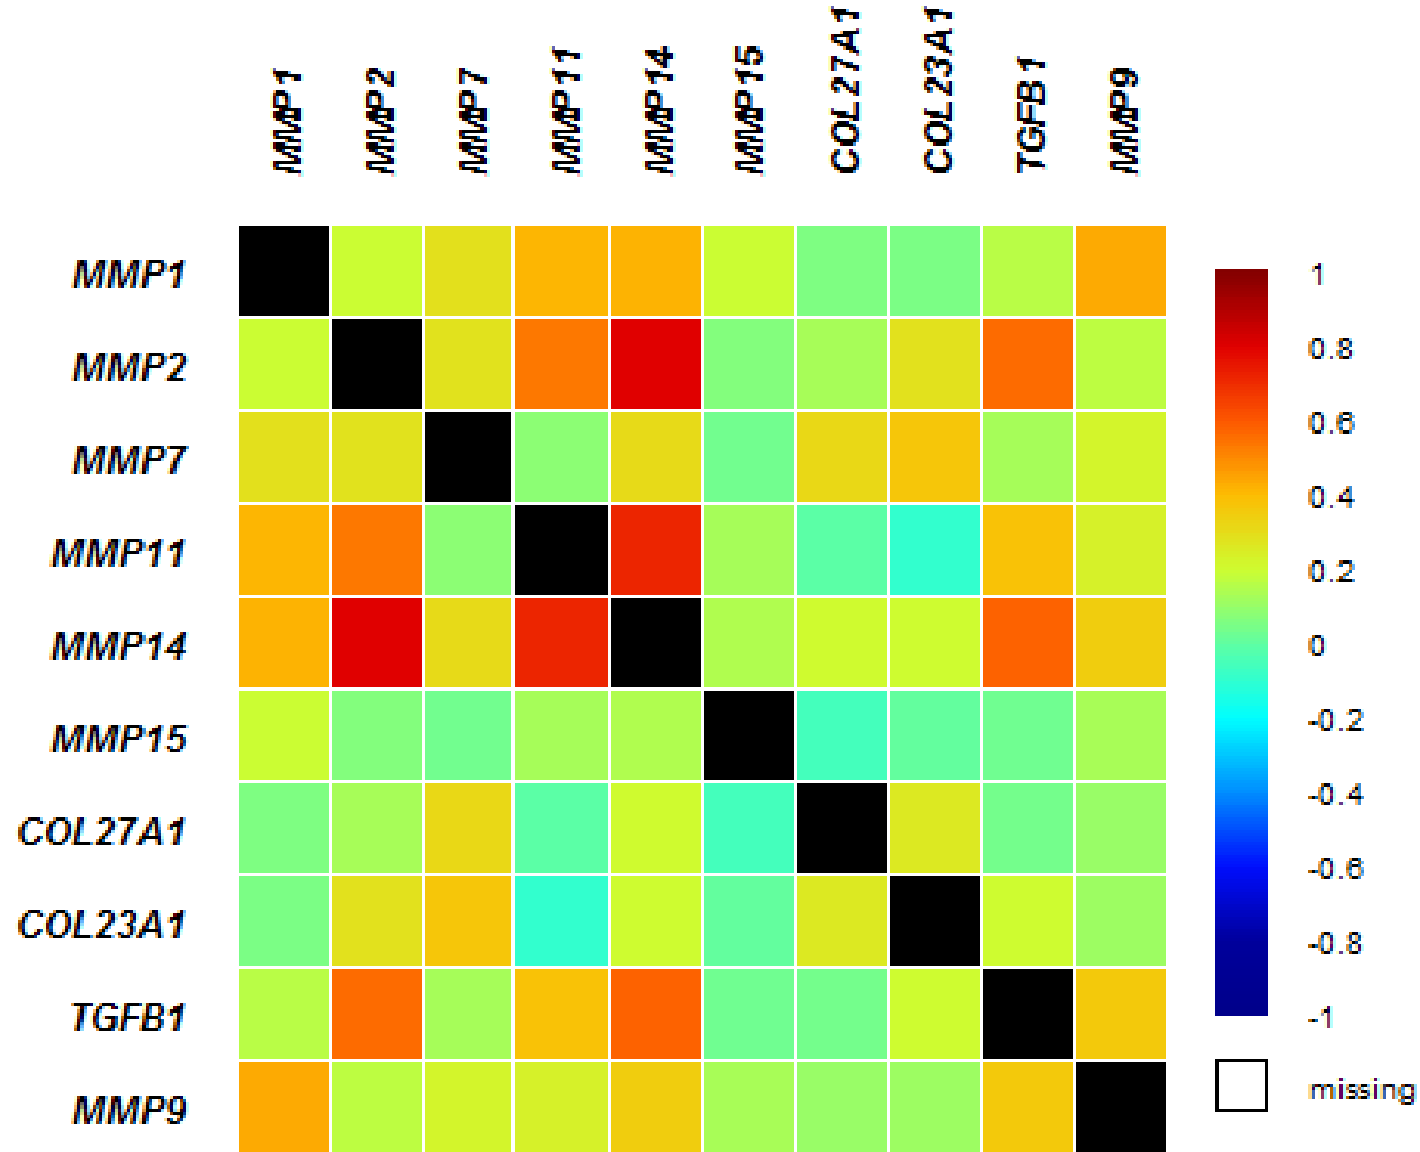

**Supplementary Fig. 2 Gene correlation targeted analysis using Breast Cancer Gene-Expression Miner v4.3**  
 Correlation map showed strong positive correlation between *MMP9* and other *MMPs*, *Collagens* and *TGFB1*
